# Supplementary material for: Unclusterable, underdispersed arrangement of insect-pollinated plants in pollinator niche space
Source: bioRxiv or medRxiv preprint supplement (doi:10.1101/2020.03.19.999169), 2020-09-29
Supplement: Supplementary file [file media-2.pdf]

**Supporting Information.** Carlos M. Herrera. Unclusterable, underdispersed arrangement of insect-pollinated plants in pollinator niche space. *Ecology*.

**Appendix S2 Number of taxonomic categories of insect pollinators recorded per plant species.**

TABLE S1. Number of different orders, families, genera and species of insect pollinators recorded for each of the plant species studied ( $N = 221$ ). Figures refer to pollinators that were reliably identified up to the corresponding level of taxonomic resolution, which explains why sometimes Species < Genera.

| Species                           | Orders | Families | Genera | Species |
|-----------------------------------|--------|----------|--------|---------|
| <i>Achillea odorata</i>           | 4      | 26       | 32     | 26      |
| <i>Acinos alpinus</i>             | 3      | 12       | 16     | 20      |
| <i>Allium roseum</i>              | 5      | 15       | 26     | 25      |
| <i>Allium scorodoprasum</i>       | 4      | 24       | 61     | 66      |
| <i>Allium sphaerocephalon</i>     | 4      | 15       | 29     | 34      |
| <i>Alyssum simplex</i>            | 4      | 5        | 5      | 5       |
| <i>Amelanchier ovalis</i>         | 3      | 11       | 16     | 19      |
| <i>Anagallis monelli</i>          | 3      | 7        | 9      | 10      |
| <i>Anarrhinum laxiflorum</i>      | 3      | 4        | 4      | 7       |
| <i>Andryala ragusina</i>          | 4      | 18       | 27     | 25      |
| <i>Anthemis pedunculata</i>       | 4      | 16       | 18     | 16      |
| <i>Anthericum liliago</i>         | 4      | 7        | 8      | 8       |
| <i>Anthyllis vulneraria</i>       | 3      | 5        | 7      | 9       |
| <i>Antirrhinum australe</i>       | 1      | 1        | 2      | 2       |
| <i>Aphyllanthes monspeliensis</i> | 5      | 17       | 42     | 38      |
| <i>Aquilegia cazorlensis</i>      | 4      | 6        | 7      | 12      |
| <i>Aquilegia vulgaris</i>         | 2      | 5        | 9      | 11      |
| <i>Arbutus unedo</i>              | 2      | 3        | 4      | 5       |
| <i>Arenaria armerina</i>          | 3      | 14       | 19     | 16      |

|                                         |   |    |    |    |
|-----------------------------------------|---|----|----|----|
| <i>Arenaria modesta</i>                 | 2 | 4  | 5  | 6  |
| <i>Arenaria obtusiflora</i>             | 3 | 19 | 21 | 14 |
| <i>Armeria filicaulis</i>               | 6 | 22 | 22 | 21 |
| <i>Armeria villosa</i>                  | 4 | 20 | 20 | 21 |
| <i>Asphodelus cerasiferus</i>           | 4 | 12 | 15 | 22 |
| <i>Astragalus bourgaeanus</i>           | 1 | 3  | 3  | 5  |
| <i>Astragalus incanus</i>               | 2 | 2  | 3  | 6  |
| <i>Atropa baetica</i>                   | 2 | 4  | 5  | 6  |
| <i>Bellis perennis</i>                  | 5 | 16 | 15 | 12 |
| <i>Bellis sylvestris</i>                | 4 | 13 | 12 | 11 |
| <i>Berberis hispanica</i>               | 3 | 17 | 23 | 26 |
| <i>Biscutella laxa</i>                  | 4 | 11 | 12 | 7  |
| <i>Calamintha nepeta</i>                | 3 | 8  | 11 | 8  |
| <i>Campanula dieckii</i>                | 4 | 14 | 17 | 16 |
| <i>Campanula mollis</i>                 | 3 | 5  | 5  | 4  |
| <i>Carduncellus<br/>monspelliensium</i> | 4 | 17 | 27 | 21 |
| <i>Carduus platypus</i>                 | 3 | 10 | 17 | 17 |
| <i>Carduus tenuiflorus</i>              | 4 | 14 | 20 | 18 |
| <i>Carlina hispanica</i>                | 4 | 13 | 37 | 34 |
| <i>Carlina racemosa</i>                 | 4 | 7  | 21 | 17 |
| <i>Catananche caerulea</i>              | 4 | 17 | 32 | 30 |
| <i>Centaurea calcitrapa</i>             | 4 | 10 | 30 | 35 |
| <i>Centaurea graminifolia</i>           | 4 | 13 | 21 | 19 |
| <i>Cerastium gibraltarium</i>           | 4 | 11 | 12 | 11 |
| <i>Chaenorhinum macropodium</i>         | 3 | 4  | 4  | 6  |
| <i>Chiliadenus glutinosus</i>           | 4 | 12 | 23 | 21 |
| <i>Chondrilla juncea</i>                | 4 | 13 | 27 | 22 |
| <i>Cirsium acaule</i>                   | 4 | 13 | 27 | 26 |
| <i>Cirsium monspessulanum</i>           | 4 | 14 | 30 | 27 |

|                                  |   |    |    |    |
|----------------------------------|---|----|----|----|
| <i>Cirsium pyrenaicum</i>        | 3 | 14 | 38 | 42 |
| <i>Cirsium vulgare</i>           | 3 | 9  | 17 | 18 |
| <i>Cistus albidus</i>            | 3 | 15 | 22 | 19 |
| <i>Cistus monspeliensis</i>      | 4 | 26 | 44 | 39 |
| <i>Cistus salviifolius</i>       | 3 | 14 | 21 | 21 |
| <i>Cleonia lusitanica</i>        | 3 | 9  | 16 | 12 |
| <i>Clinopodium vulgare</i>       | 3 | 6  | 10 | 9  |
| <i>Conopodium arvense</i>        | 3 | 12 | 12 | 10 |
| <i>Convolvulus arvensis</i>      | 4 | 14 | 20 | 18 |
| <i>Coris monspeliensis</i>       | 5 | 9  | 14 | 13 |
| <i>Crataegus monogyna</i>        | 3 | 14 | 20 | 23 |
| <i>Crepis albida</i>             | 4 | 7  | 7  | 6  |
| <i>Crocus nevadensis</i>         | 2 | 3  | 3  | 4  |
| <i>Crocus nudiflorus</i>         | 3 | 5  | 8  | 8  |
| <i>Cuscuta triumvirati</i>       | 4 | 17 | 26 | 19 |
| <i>Daphne gnidium</i>            | 3 | 9  | 15 | 14 |
| <i>Daphne laureola</i>           | 4 | 6  | 7  | 10 |
| <i>Digitalis obscura</i>         | 1 | 5  | 8  | 9  |
| <i>Draba hispanica</i>           | 4 | 11 | 11 | 9  |
| <i>Echinopartum boissieri</i>    | 2 | 5  | 8  | 11 |
| <i>Echium flavum</i>             | 3 | 7  | 13 | 18 |
| <i>Erinacea anthyllis</i>        | 3 | 7  | 11 | 17 |
| <i>Erodium cazorlanum</i>        | 4 | 9  | 7  | 7  |
| <i>Erodium cheilanthifolium</i>  | 4 | 11 | 12 | 12 |
| <i>Erodium cicutarium</i>        | 3 | 11 | 11 | 7  |
| <i>Erophila verna</i>            | 2 | 4  | 3  | 6  |
| <i>Eryngium campestre</i>        | 4 | 32 | 70 | 69 |
| <i>Eryngium dilatatum</i>        | 4 | 22 | 49 | 50 |
| <i>Erysimum cazorlense</i>       | 5 | 9  | 9  | 9  |
| <i>Erysimum medio-hispanicum</i> | 4 | 14 | 15 | 13 |

|                                  |   |    |    |    |
|----------------------------------|---|----|----|----|
| <i>Euphorbia nicaeensis</i>      | 4 | 32 | 52 | 45 |
| <i>Filipendula vulgaris</i>      | 5 | 14 | 17 | 14 |
| <i>Fumana baetica</i>            | 4 | 13 | 23 | 22 |
| <i>Fumana paradoxa</i>           | 4 | 11 | 16 | 17 |
| <i>Fumana procumbens</i>         | 3 | 8  | 9  | 6  |
| <i>Gagea soleirolii</i>          | 4 | 13 | 15 | 13 |
| <i>Galatella linosyris</i>       | 4 | 18 | 34 | 29 |
| <i>Galium verum</i>              | 5 | 20 | 30 | 29 |
| <i>Genista longipes</i>          | 2 | 5  | 5  | 6  |
| <i>Genista pseudopilosa</i>      | 1 | 4  | 4  | 6  |
| <i>Genista scorpius</i>          | 2 | 4  | 6  | 8  |
| <i>Geranium molle</i>            | 4 | 10 | 11 | 11 |
| <i>Geum sylvaticum</i>           | 4 | 12 | 17 | 16 |
| <i>Gladiolus illyricus</i>       | 3 | 13 | 24 | 25 |
| <i>Globularia spinosa</i>        | 6 | 13 | 12 | 8  |
| <i>Gymnadenia conopsea</i>       | 1 | 3  | 3  | 5  |
| <i>Hedera helix</i>              | 3 | 15 | 24 | 24 |
| <i>Helianthemum apenninum</i>    | 5 | 21 | 30 | 25 |
| <i>Helianthemum cinereum</i>     | 3 | 7  | 8  | 3  |
| <i>Helianthemum oelandicum</i>   | 4 | 12 | 17 | 15 |
| <i>Helleborus foetidus</i>       | 1 | 4  | 6  | 5  |
| <i>Hepatica nobilis</i>          | 2 | 3  | 2  | 4  |
| <i>Himantoglossum hircinum</i>   | 2 | 5  | 7  | 6  |
| <i>Hormathophylla baetica</i>    | 3 | 5  | 5  | 5  |
| <i>Hormathophylla spinosa</i>    | 3 | 8  | 9  | 8  |
| <i>Hyacinthoides reverchonii</i> | 2 | 7  | 8  | 8  |
| <i>Hypericum caprifolium</i>     | 3 | 8  | 11 | 11 |
| <i>Hypericum ericoides</i>       | 3 | 4  | 9  | 7  |
| <i>Hypericum perforatum</i>      | 5 | 20 | 33 | 42 |
| <i>Iberis carnosa</i>            | 2 | 3  | 4  | 4  |

|                                |   |    |    |    |
|--------------------------------|---|----|----|----|
| <i>Inula montana</i>           | 4 | 21 | 48 | 44 |
| <i>Iris foetidissima</i>       | 1 | 1  | 2  | 4  |
| <i>Iris planifolia</i>         | 1 | 3  | 3  | 4  |
| <i>Jasonia tuberosa</i>        | 4 | 11 | 20 | 19 |
| <i>Jonopsidium prolongoi</i>   | 5 | 11 | 9  | 7  |
| <i>Jurinea humilis</i>         | 5 | 13 | 16 | 14 |
| <i>Klasea nudicaulis</i>       | 5 | 20 | 24 | 25 |
| <i>Klasea pinnatifida</i>      | 4 | 20 | 44 | 46 |
| <i>Knautia subscaposa</i>      | 4 | 22 | 50 | 52 |
| <i>Lamium amplexicaule</i>     | 1 | 3  | 4  | 6  |
| <i>Lavandula latifolia</i>     | 3 | 19 | 52 | 63 |
| <i>Leontodon longirrostris</i> | 3 | 11 | 14 | 10 |
| <i>Leucanthemopsis pallida</i> | 4 | 14 | 14 | 12 |
| <i>Linaria aeruginea</i>       | 2 | 3  | 3  | 3  |
| <i>Linaria verticillata</i>    | 1 | 2  | 3  | 4  |
| <i>Linaria viscosa</i>         | 2 | 3  | 6  | 8  |
| <i>Linum bienne</i>            | 3 | 4  | 4  | 6  |
| <i>Linum narbonense</i>        | 4 | 8  | 9  | 6  |
| <i>Linum tenue</i>             | 4 | 16 | 28 | 29 |
| <i>Lithodora fruticosa</i>     | 3 | 7  | 11 | 16 |
| <i>Lonicera arborea</i>        | 2 | 4  | 6  | 9  |
| <i>Lysimachia ephemerum</i>    | 4 | 20 | 34 | 37 |
| <i>Lythrum junceum</i>         | 4 | 8  | 9  | 7  |
| <i>Lythrum salicaria</i>       | 3 | 6  | 13 | 15 |
| <i>Mantisalca salmantica</i>   | 4 | 25 | 48 | 59 |
| <i>Marrubium supinum</i>       | 4 | 16 | 27 | 27 |
| <i>Mentha aquatica</i>         | 4 | 13 | 18 | 19 |
| <i>Merendera montana</i>       | 3 | 10 | 16 | 15 |
| <i>Narcissus bujei</i>         | 3 | 6  | 7  | 12 |
| <i>Narcissus cuatrecasasii</i> | 3 | 6  | 7  | 10 |

|                                  |   |    |    |    |
|----------------------------------|---|----|----|----|
| <i>Narcissus hedraeanthus</i>    | 3 | 5  | 5  | 5  |
| <i>Narcissus longispathus</i>    | 4 | 12 | 18 | 26 |
| <i>Narcissus triandrus</i>       | 1 | 2  | 2  | 4  |
| <i>Nepeta tuberosa</i>           | 3 | 6  | 8  | 8  |
| <i>Ononis pusilla</i>            | 1 | 3  | 4  | 4  |
| <i>Ononis spinosa</i>            | 1 | 2  | 5  | 8  |
| <i>Orchis coriophora</i>         | 3 | 14 | 19 | 18 |
| <i>Origanum virens</i>           | 3 | 11 | 13 | 13 |
| <i>Ornithogalum umbellatum</i>   | 5 | 14 | 14 | 11 |
| <i>Orobanche haenseleri</i>      | 1 | 2  | 3  | 3  |
| <i>Papaver dubium</i>            | 4 | 7  | 12 | 13 |
| <i>Parnassia palustris</i>       | 2 | 3  | 3  | 3  |
| <i>Petrorhagia nanteuillii</i>   | 4 | 11 | 18 | 13 |
| <i>Phlomis herba-venti</i>       | 3 | 9  | 18 | 15 |
| <i>Phlomis lychnitis</i>         | 2 | 4  | 7  | 6  |
| <i>Picnomon acarna</i>           | 3 | 8  | 18 | 23 |
| <i>Pilosella pseudopilosella</i> | 4 | 19 | 24 | 18 |
| <i>Pistorinia hispanica</i>      | 3 | 6  | 10 | 9  |
| <i>Plumbago europaea</i>         | 3 | 12 | 32 | 34 |
| <i>Polygala boissieri</i>        | 3 | 5  | 6  | 5  |
| <i>Polygonatum odoratum</i>      | 1 | 1  | 2  | 3  |
| <i>Potentilla caulescens</i>     | 4 | 10 | 17 | 18 |
| <i>Potentilla reptans</i>        | 3 | 12 | 12 | 10 |
| <i>Primula acaulis</i>           | 3 | 4  | 4  | 7  |
| <i>Prolongoa hispanica</i>       | 5 | 12 | 16 | 10 |
| <i>Prunus mahaleb</i>            | 3 | 10 | 14 | 17 |
| <i>Pterocephalus spathulatus</i> | 3 | 10 | 21 | 21 |
| <i>Ptilostemon hispanicus</i>    | 3 | 11 | 26 | 27 |
| <i>Ranunculus bulbosus</i>       | 5 | 19 | 23 | 17 |
| <i>Ranunculus ficaria</i>        | 3 | 8  | 8  | 8  |

|                                 |   |    |    |    |
|---------------------------------|---|----|----|----|
| <i>Ranunculus malessanus</i>    | 4 | 16 | 16 | 14 |
| <i>Ranunculus paludosus</i>     | 4 | 17 | 22 | 21 |
| <i>Ranunculus repens</i>        | 4 | 18 | 28 | 18 |
| <i>Rhagadiolus edulis</i>       | 3 | 10 | 10 | 7  |
| <i>Roemeria argemone</i>        | 3 | 5  | 4  | 4  |
| <i>Rosa canina</i>              | 3 | 12 | 18 | 19 |
| <i>Rosa micrantha</i>           | 4 | 20 | 41 | 43 |
| <i>Rosa sicula</i>              | 3 | 8  | 12 | 13 |
| <i>Rosmarinus officinalis</i>   | 3 | 13 | 22 | 28 |
| <i>Rubus ulmifolius</i>         | 4 | 18 | 44 | 46 |
| <i>Salvia lavandulifolia</i>    | 4 | 8  | 10 | 9  |
| <i>Salvia verbenaca</i>         | 2 | 5  | 9  | 6  |
| <i>Santolina rosmarinifolia</i> | 5 | 28 | 42 | 38 |
| <i>Saponaria ocymoides</i>      | 2 | 3  | 4  | 7  |
| <i>Satureja intricata</i>       | 4 | 23 | 43 | 45 |
| <i>Saxifraga haenseleri</i>     | 3 | 9  | 9  | 5  |
| <i>Saxifraga carpetana</i>      | 3 | 8  | 6  | 5  |
| <i>Scabiosa andryaefolia</i>    | 3 | 11 | 26 | 27 |
| <i>Scilla paui</i>              | 2 | 6  | 7  | 8  |
| <i>Scorzonera albicans</i>      | 5 | 8  | 8  | 6  |
| <i>Sedum album</i>              | 5 | 30 | 57 | 52 |
| <i>Sedum dasyphyllum</i>        | 3 | 6  | 10 | 7  |
| <i>Sedum mucizonia</i>          | 4 | 8  | 11 | 11 |
| <i>Sedum sediforme</i>          | 4 | 14 | 21 | 24 |
| <i>Senecio doria</i>            | 4 | 14 | 20 | 20 |
| <i>Senecio malacitanus</i>      | 3 | 13 | 22 | 22 |
| <i>Seseli montanum</i>          | 3 | 11 | 19 | 12 |
| <i>Sideritis incana</i>         | 3 | 11 | 18 | 14 |
| <i>Silene colorata</i>          | 3 | 6  | 6  | 8  |
| <i>Silene psammitis</i>         | 3 | 7  | 10 | 7  |

|                                |   |    |    |    |
|--------------------------------|---|----|----|----|
| <i>Sisymbrella aspera</i>      | 4 | 18 | 21 | 20 |
| <i>Sisymbrium crassifolium</i> | 3 | 8  | 8  | 7  |
| <i>Solidago virgaurea</i>      | 2 | 5  | 8  | 7  |
| <i>Sonchus aquatilis</i>       | 4 | 11 | 22 | 20 |
| <i>Stachys officinalis</i>     | 3 | 15 | 27 | 27 |
| <i>Taraxacum laevigatum</i>    | 5 | 14 | 20 | 18 |
| <i>Teucrium aureum</i>         | 3 | 18 | 32 | 36 |
| <i>Teucrium rotundifolium</i>  | 3 | 6  | 7  | 10 |
| <i>Teucrium webbianum</i>      | 2 | 4  | 7  | 7  |
| <i>Thymus mastichina</i>       | 4 | 17 | 32 | 32 |
| <i>Thymus orospedanus</i>      | 3 | 14 | 21 | 17 |
| <i>Thymus serpylloides</i>     | 3 | 8  | 15 | 14 |
| <i>Trifolium campestre</i>     | 3 | 8  | 11 | 7  |
| <i>Ulex parviflorus</i>        | 2 | 5  | 6  | 7  |
| <i>Urginea maritima</i>        | 3 | 10 | 21 | 20 |
| <i>Valeriana tuberosa</i>      | 4 | 14 | 22 | 20 |
| <i>Verbascum giganteum</i>     | 3 | 9  | 18 | 17 |
| <i>Verbascum sinuatum</i>      | 3 | 8  | 20 | 18 |
| <i>Viburnum tinus</i>          | 3 | 14 | 17 | 13 |
| <i>Vicia onobrychioides</i>    | 3 | 4  | 9  | 8  |
| <i>Vicia pseudocracca</i>      | 3 | 4  | 8  | 11 |
| <i>Viola cazorlensis</i>       | 2 | 2  | 2  | 3  |
| <i>Viola odorata</i>           | 1 | 2  | 3  | 6  |

---
